# Supplementary material for: Manganese in Diagnostics: A Preformulatory Study
Source: MDPI journal article supplement (doi:10.3390/pharmaceutics14010108), 2022-01-03
Supplement: s1 [file s1]

## Supplementary Materials: Manganese in Diagnostics: A Preformulatory Study

Maddalena Sguizzato, Walter Pula, Anna Bordin, Antonella Pagnoni, Markus Drechsler, Lorenza Marvelli and Rita Cortesi

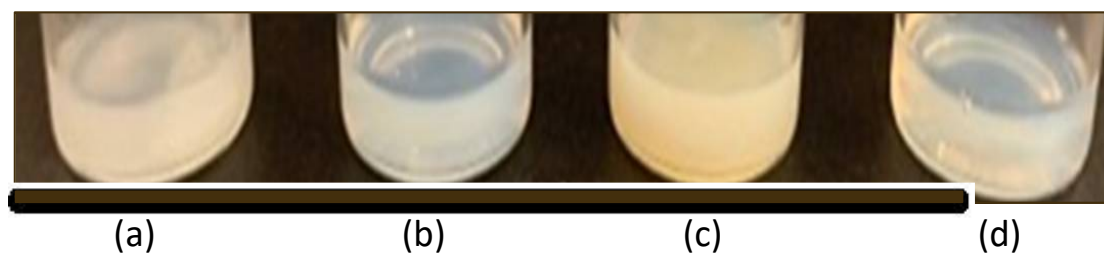

**Figure S1:** Macroscopic appearance of LP-SD (a), LP-NLS (b), LP-PAG (c) and LP-SLL (d) 30 days after extrusion.
